# Supplementary material
Source: MDPI journal article supplement (https://www.mdpi.com/2227-7102/11/8/436)
Supplement: s1 [file s1]

## Supplementary Materials

### Section II

**Table S1.** Sample of Questionnaire.

| Please indicate the extent to which you disagree or agree to the following statements selecting an appropriate number on the scale of 1 (Strongly Disagree) to 7 (Strongly Agree). |           |                                                                                                |                          |                          |                          |                          |                          |                          |
|------------------------------------------------------------------------------------------------------------------------------------------------------------------------------------|-----------|------------------------------------------------------------------------------------------------|--------------------------|--------------------------|--------------------------|--------------------------|--------------------------|--------------------------|
| Latent Variable                                                                                                                                                                    | Item code | Indicators                                                                                     | Scale                    |                          |                          |                          |                          |                          |
|                                                                                                                                                                                    |           |                                                                                                | (1)                      | (2)                      | (3)                      | (4)                      | (5)                      | (6) (7)                  |
| Self- Efficacy                                                                                                                                                                     | SE1       | I am confident of using the e-learning even if there is no one around to show me how to do it. | <input type="checkbox"/> |
|                                                                                                                                                                                    | SE2       | I am confident of using the e-learning even if I have never used such a system before.         | <input type="checkbox"/> |
|                                                                                                                                                                                    | SE3       | I am confident of using the e-learning even if I have only the software manuals for reference  | <input type="checkbox"/> |
| Relevance                                                                                                                                                                          | RE1       | E-learning is necessary for my major studies.                                                  | <input type="checkbox"/> |
|                                                                                                                                                                                    | RE2       | E-learning can help my major studies.                                                          | <input type="checkbox"/> |
|                                                                                                                                                                                    | RE3       | E-learning is an integral-part of my major studies.                                            | <input type="checkbox"/> |
|                                                                                                                                                                                    | RE4       | E-learning would make it easy for me to secure a job opportunity in the future.                | <input type="checkbox"/> |
|                                                                                                                                                                                    | RE5       | E-learning is necessary for me to cope with rapid changes in technology.                       | <input type="checkbox"/> |

|                       |     |                                                                        |                          |                          |                          |                          |                          |                          |                          |
|-----------------------|-----|------------------------------------------------------------------------|--------------------------|--------------------------|--------------------------|--------------------------|--------------------------|--------------------------|--------------------------|
| Experience            | EX1 | I really enjoy using computers.                                        | <input type="checkbox"/> |
|                       | EX2 | I am comfortable in using the internet.                                | <input type="checkbox"/> |
|                       | EX3 | I have skills to save and locate files in the computer.                | <input type="checkbox"/> |
|                       | EX4 | Overall, I feel confident about using computers and the internet.      | <input type="checkbox"/> |
| Computer Anxiety      | CA1 | Computers do not scare me at all.<br>(Reverse Coded)                   | <input type="checkbox"/> |
|                       | CA2 | Computers make me feel uncomfortable.                                  | <input type="checkbox"/> |
|                       | CA3 | Working with computers make me nervous.                                | <input type="checkbox"/> |
| Perceived Usefulness  | PU1 | I can accomplish my learning tasks more quickly by using e-learning.   | <input type="checkbox"/> |
|                       | PU2 | I can improve my learning performance by using e-learning.             | <input type="checkbox"/> |
|                       | PU3 | I can enhance my effectiveness in learning by using e-learning.        | <input type="checkbox"/> |
|                       | PU4 | I can achieve my learning goals by using e-learning.                   | <input type="checkbox"/> |
|                       | PU5 | I think e-learning is very useful for my learning.                     | <input type="checkbox"/> |
| Perceived Ease of Use | PE1 | It would be easy for me to learn how to use e-learning.                | <input type="checkbox"/> |
|                       | PE2 | I would find it easy to get the e-learning to do what I want it to do. | <input type="checkbox"/> |
|                       | PE3 | My interactions with the e-learning would be clear and understandable. | <input type="checkbox"/> |
|                       | PE4 | I think using e-learning is easy for me.                               | <input type="checkbox"/> |

|                              |      |                                                                             |                          |                          |                          |                          |                          |                          |                          |
|------------------------------|------|-----------------------------------------------------------------------------|--------------------------|--------------------------|--------------------------|--------------------------|--------------------------|--------------------------|--------------------------|
| Subjective Norms             | SN1  | My teachers think that I should use the e-learning.                         | <input type="checkbox"/> |
|                              | SN2  | My parents think that I should use the e-learning.                          | <input type="checkbox"/> |
|                              | SN3  | My colleagues think that I should use the e-learning.                       | <input type="checkbox"/> |
|                              | SN4  | Overall, people who are important to me think that I should use e-learning. | <input type="checkbox"/> |
| Facilitating Condition       | FC1  | I have access to a stable internet connection.                              | <input type="checkbox"/> |
|                              | FC2  | Internet charges are affordable to me.                                      | <input type="checkbox"/> |
|                              | FC3  | I have necessary equipment for e-learning (i.e. computer, tab etc.)         | <input type="checkbox"/> |
|                              | FC4  | I can easily access to the university LMS.                                  | <input type="checkbox"/> |
|                              | FC5  | I can easily download and upload necessary documents from and to the LMS.   | <input type="checkbox"/> |
|                              | FC6  | The information available on the LMS is well-structured.                    | <input type="checkbox"/> |
|                              | FC7  | The information available on the LMS is clearly presented.                  | <input type="checkbox"/> |
|                              | FC8  | I can interact with classmates through internet.                            | <input type="checkbox"/> |
|                              | FC9  | I can easily reach to my teachers/instructors through internet.             | <input type="checkbox"/> |
|                              | FC10 | My home environment is suitable for e-learning.                             | <input type="checkbox"/> |
| Attitudes Towards E-Learning | AT1  | It is good for me to use e-learning for my learning.                        | <input type="checkbox"/> |
|                              | AT2  | It is meaningful for me to use e-learning for learning.                     | <input type="checkbox"/> |

|                       |     |                                                                       |                          |                          |                          |                          |                          |                          |                          |
|-----------------------|-----|-----------------------------------------------------------------------|--------------------------|--------------------------|--------------------------|--------------------------|--------------------------|--------------------------|--------------------------|
|                       | AT3 | It is valuable for me to use e-learning for my learning.              | <input type="checkbox"/> |
|                       | AT4 | It is worthwhile for me to use e-learning for my learning.            | <input type="checkbox"/> |
| Behavioural Intention | BI1 | Assuming I had access to the e-learning, I intend to use it.          | <input type="checkbox"/> |
|                       | BI2 | Given that I had access to e-learning, I predict that I would use it. | <input type="checkbox"/> |
|                       | BI3 | I plan to use e-learning in the future.                               | <input type="checkbox"/> |

Please indicate how much the following situations might have influenced your decision to use e-learning for your studies on the scale of 1 (Not influenced at all) to 7 (High influenced).

|                                                         |     |                                                                                                           |                          |                          |                          |                          |                          |                          |                          |
|---------------------------------------------------------|-----|-----------------------------------------------------------------------------------------------------------|--------------------------|--------------------------|--------------------------|--------------------------|--------------------------|--------------------------|--------------------------|
| Effect of COVID-19 on e-learning (Precipitating Events) | CV1 | How much has "COVID-19 outbreak in the country" influenced your decision to use e-learning?               | <input type="checkbox"/> |
|                                                         | CV2 | How much has "stay home" influenced your decision to use e-learning?                                      | <input type="checkbox"/> |
|                                                         | CV3 | How much has "travel restrictions due to lockdown and curfew" influenced your decision to use e-learning? | <input type="checkbox"/> |

### Section III

Please indicate, on average, *how long* do you spend on the followings in a day after the COVID-19 outbreak in the Country

| Latent Variable | Item code | Indicators | Scale |
|-----------------|-----------|------------|-------|
|-----------------|-----------|------------|-------|

|                            |     |                                                                                                      |                                                                                                                                |                                                                                                                                                                         |
|----------------------------|-----|------------------------------------------------------------------------------------------------------|--------------------------------------------------------------------------------------------------------------------------------|-------------------------------------------------------------------------------------------------------------------------------------------------------------------------|
|                            | AU1 | University LMS                                                                                       | <input type="checkbox"/> Not at all<br><input type="checkbox"/> Less than 15 minutes<br><input type="checkbox"/> 15-30 minutes | <input type="checkbox"/> 30 minutes to 1 hour<br><input type="checkbox"/> 1-2 hours<br><input type="checkbox"/> 2-3 hours<br><input type="checkbox"/> More than 3 hours |
| Actual Usage of E-learning | AU2 | Other e-learning platforms (YouTube, WebEx, Webinars, Discussion board, Forums, Zoom, Podcasts, etc) | <input type="checkbox"/> Not at all<br><input type="checkbox"/> Less than 15 minutes<br><input type="checkbox"/> 15-30 minutes | <input type="checkbox"/> 30 minutes to 1 hour<br><input type="checkbox"/> 1-2 hours<br><input type="checkbox"/> 2-3 hours<br><input type="checkbox"/> More than 3 hours |

Please indicate *how frequently* do you use the followings in a week.

| Latent Variable            | Item code | Indicators                                                                                           | Scale                                                                                                                          |                                                                                                                                                                                          |
|----------------------------|-----------|------------------------------------------------------------------------------------------------------|--------------------------------------------------------------------------------------------------------------------------------|------------------------------------------------------------------------------------------------------------------------------------------------------------------------------------------|
|                            | AU3       | University LMS                                                                                       | <input type="checkbox"/> Not at all<br><input type="checkbox"/> About once a week<br><input type="checkbox"/> 1-2 times a week | <input type="checkbox"/> 2-3 times a week<br><input type="checkbox"/> 4-5 times a week<br><input type="checkbox"/> 6-7 times a week<br><input type="checkbox"/> More than 7 times a week |
| Actual Usage of E-learning | AU4       | Other e-learning platforms (YouTube, WebEx, Webinars, Discussion board, Forums, Zoom, Podcasts, etc) | <input type="checkbox"/> Not at all<br><input type="checkbox"/> About once a week<br><input type="checkbox"/> 1-2 times a week | <input type="checkbox"/> 2-3 times a week<br><input type="checkbox"/> 4-5 times a week<br><input type="checkbox"/> 6-7 times a week<br><input type="checkbox"/> More than 7 times a week |

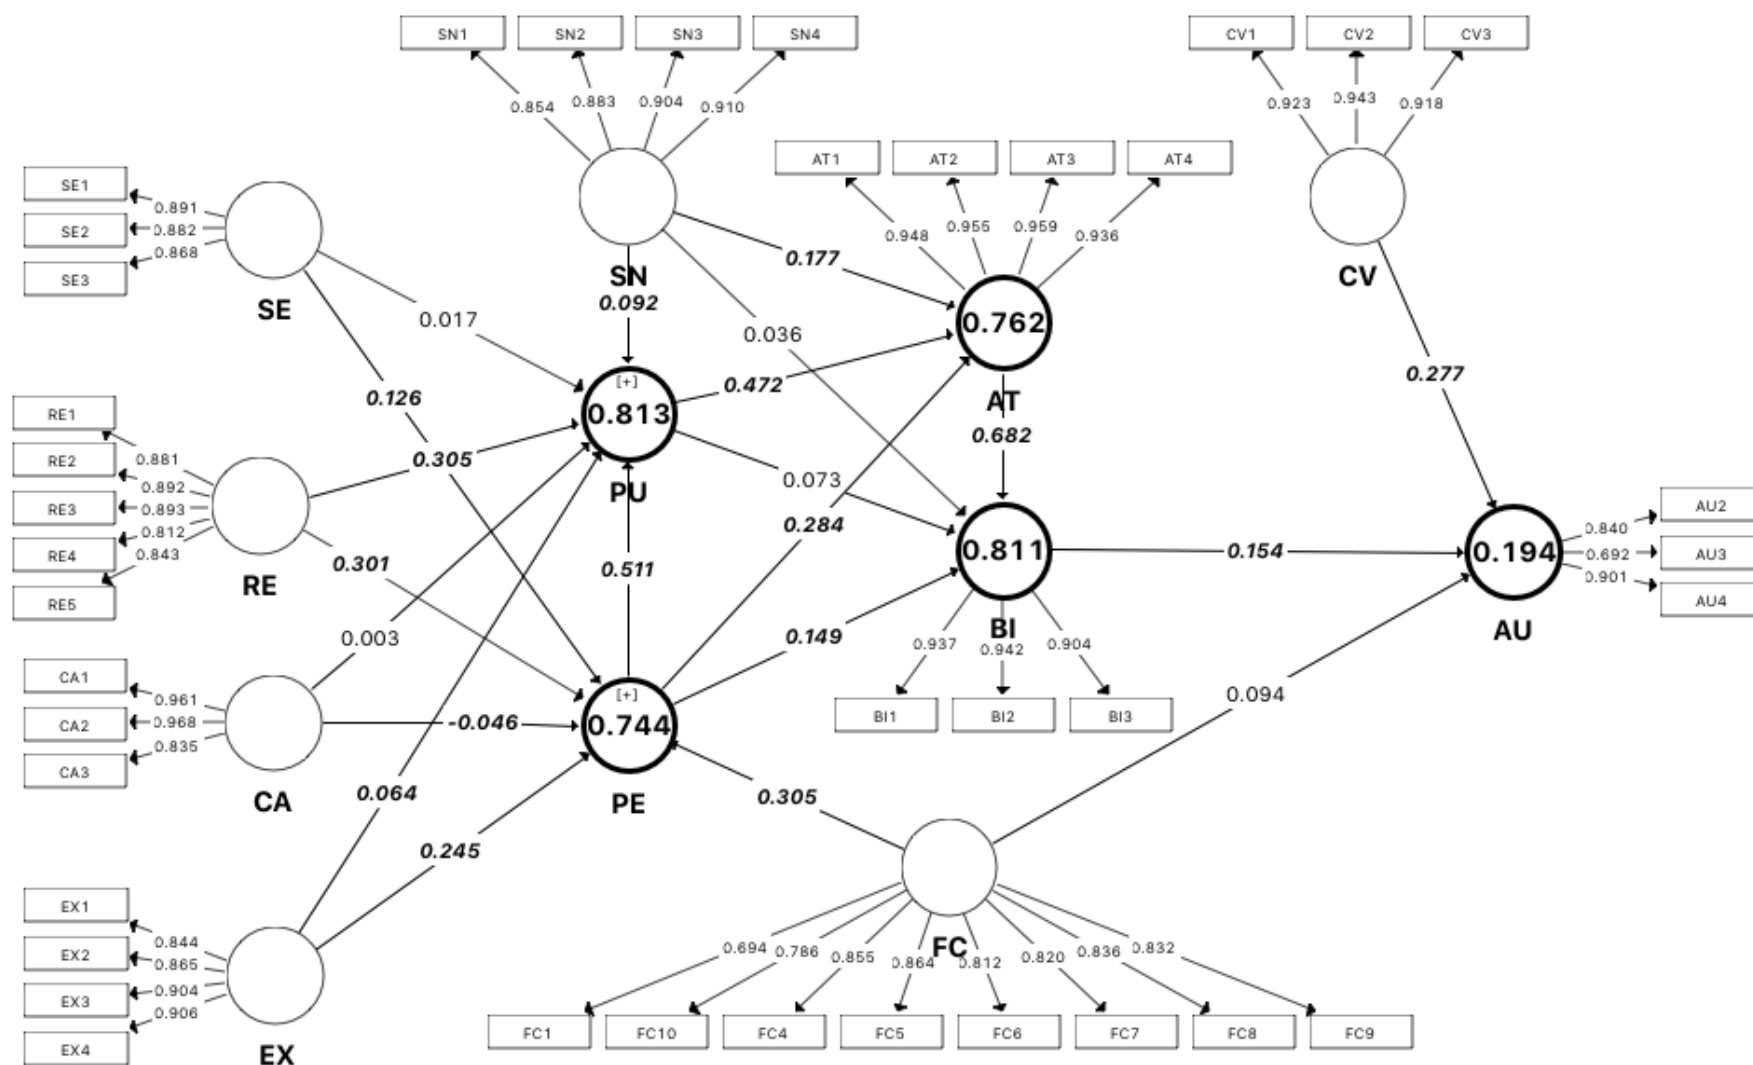

Figure S1. Results of the PLS-SEM analysis.

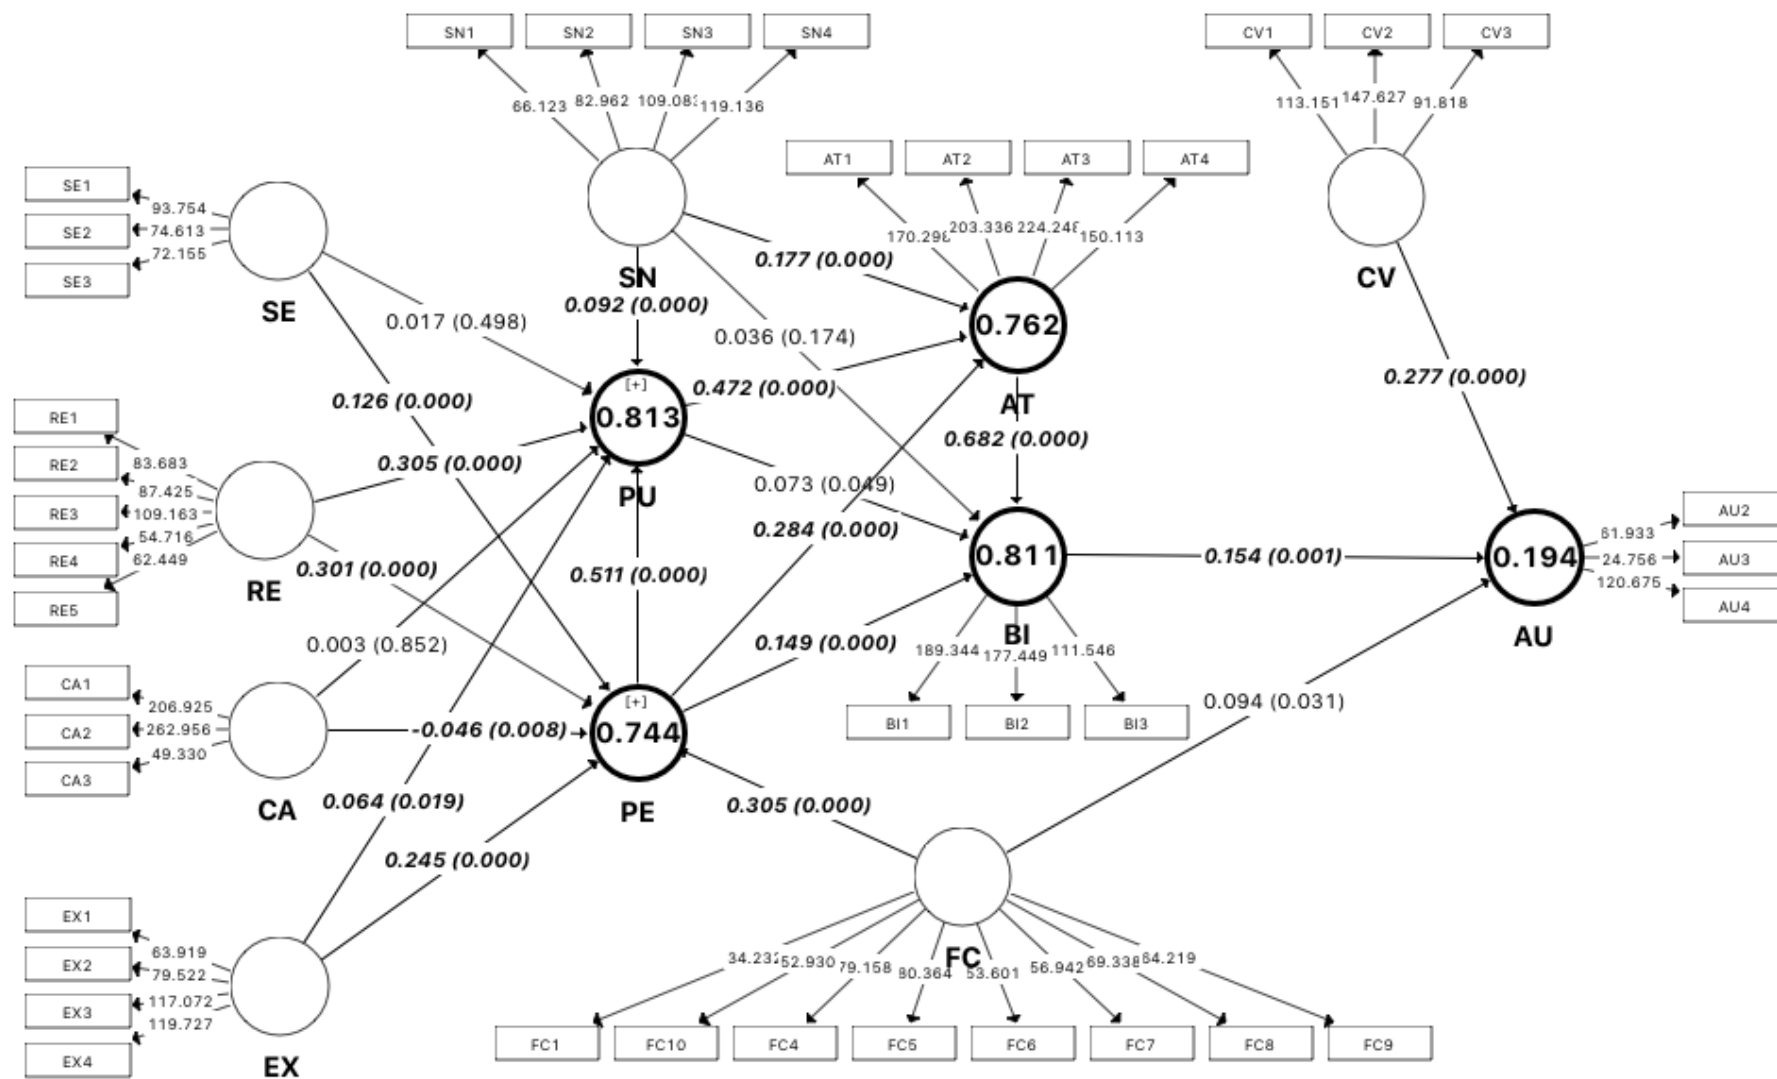

Figure S2. Bootstrapping Results of the PLS-SEM analysis.

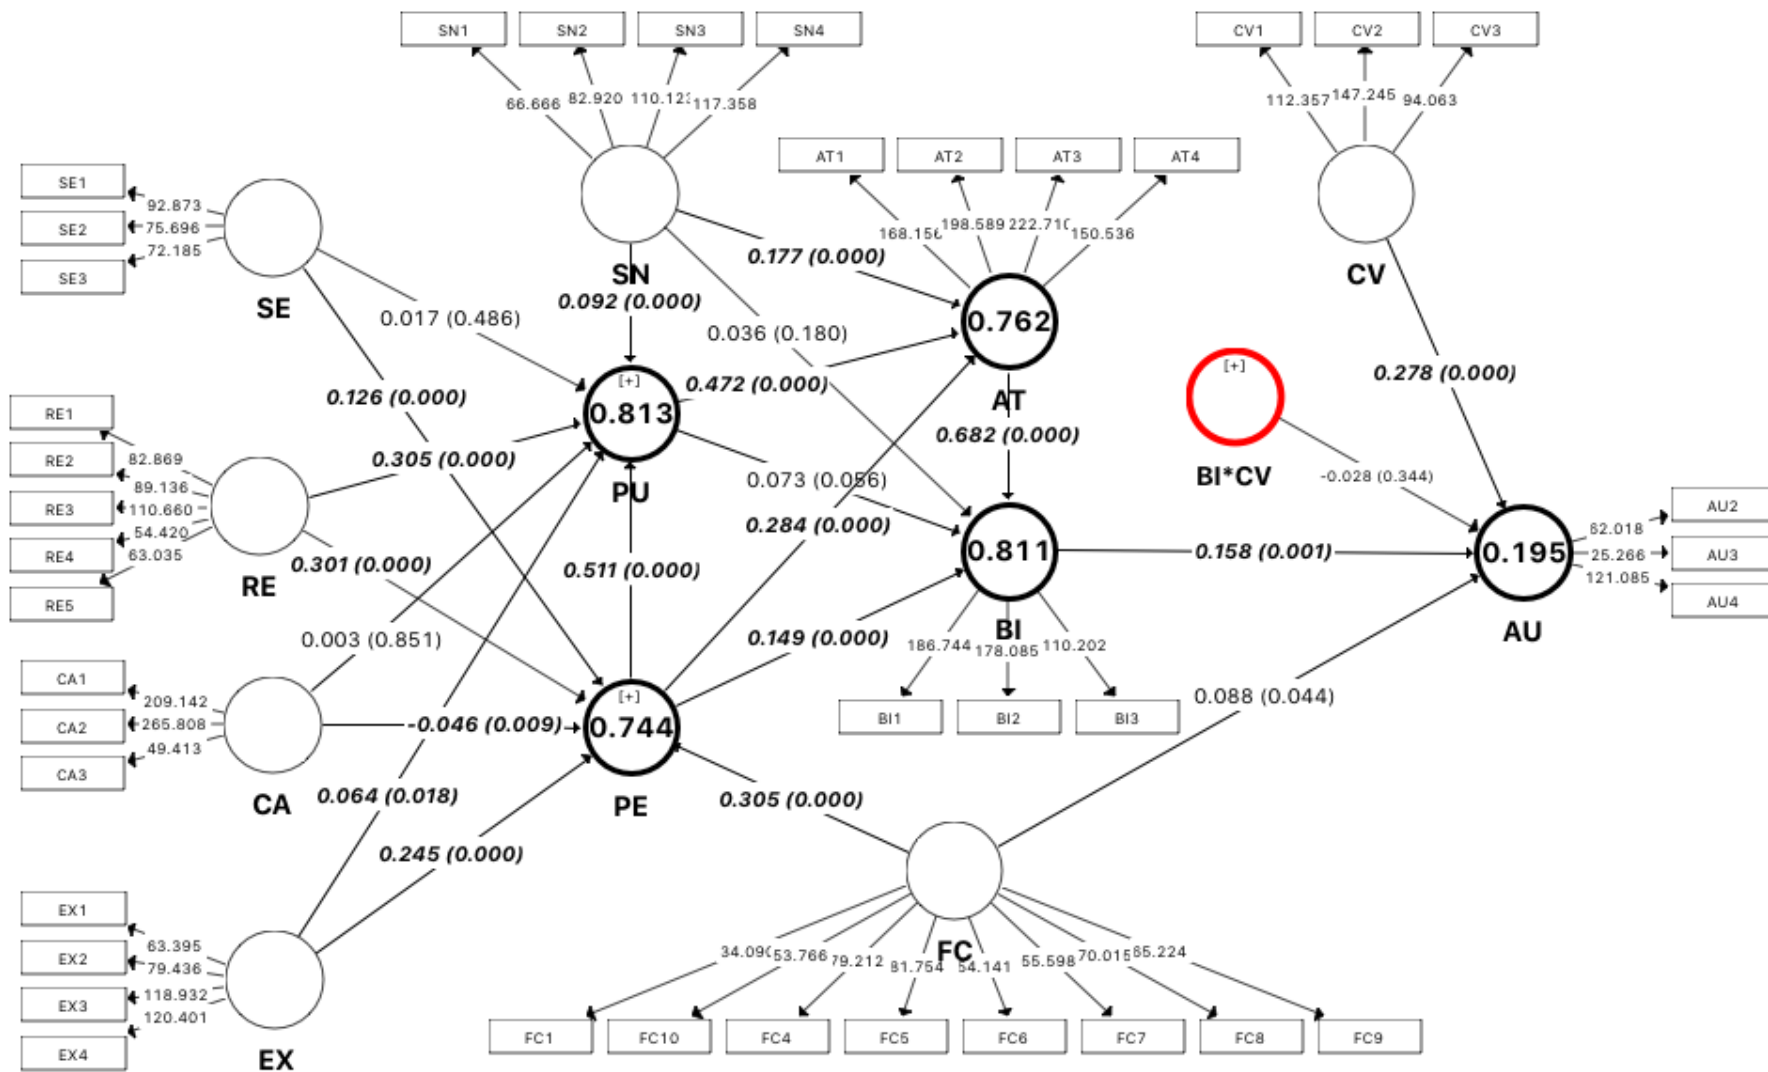

Figure S3. Results of the Moderating analysis.
